# Supplementary material for: Preclinical Studies Comparing Efficacy and Toxicity of DNA Repair Inhibitors, Olaparib, and AsiDNA, in the Treatment of Carboplatin-Resistant Tumors
Source: PubMed Central journal article supplement (PMC6861330; doi:10.3389/fonc.2019.01097), 2019-11-12
Supplement: Data_Sheet_1.pdf [file Data_Sheet_1.pdf]

## Supplementary Material

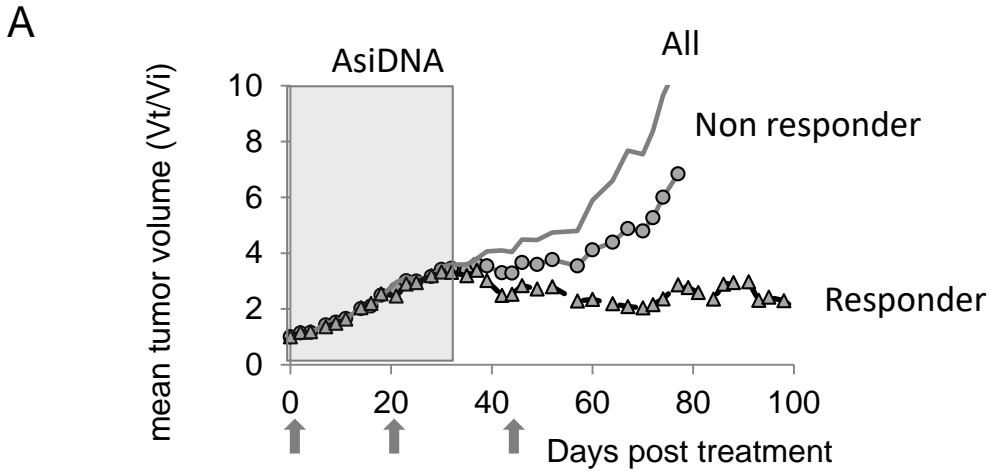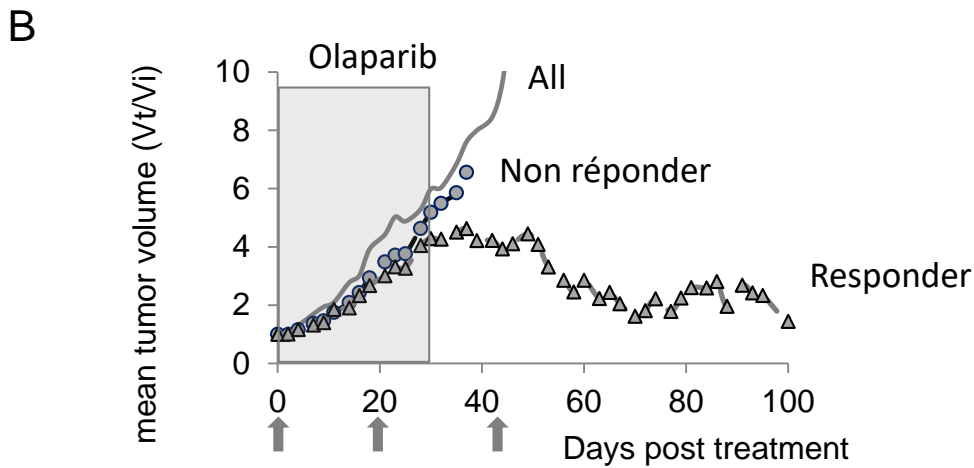

**Figure S1: Detailed response to AsiDNA (A) or olaparib (B).** Mean tumor growth of all mice (grey line). As response was heterogeneous in both treatments, groups were divided as responder and non responder according to their survival to allow longer growth tumor follow up: responder (A,B, n=4), survival>100 days and non-responder (A,n=4; B, n=5), survival<100). Grey rectangle, progression time before response to treatment; Arrows, beginning of cycles of treatment.

A

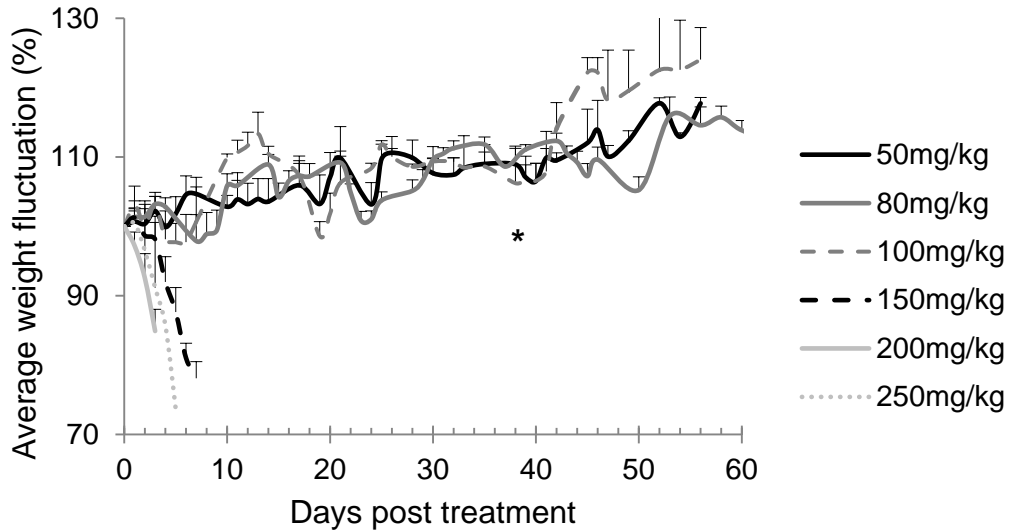

B

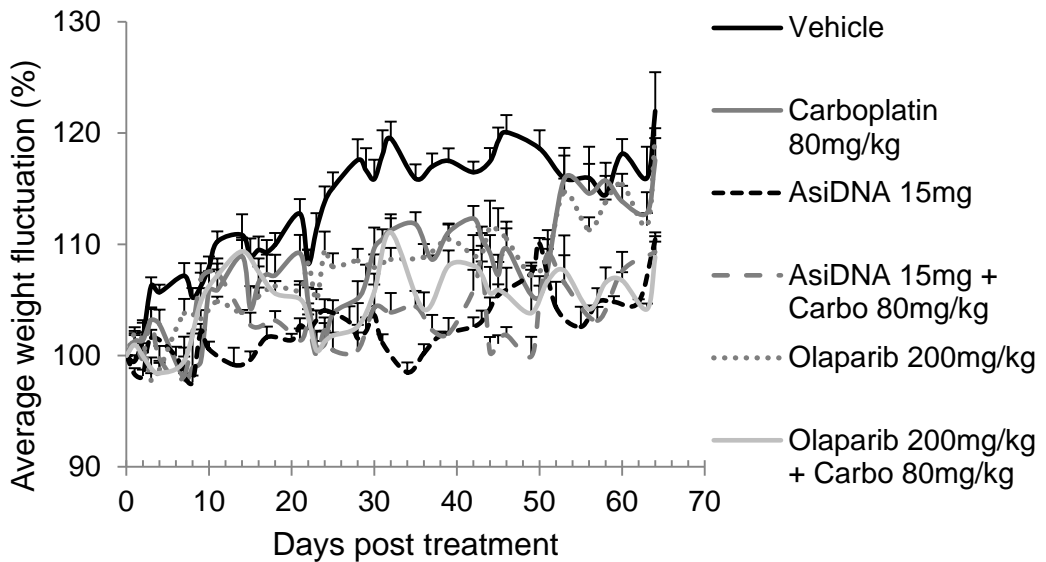

**Supplementary figure S2: Average weight fluctuations with various treatments (A)** single injection of increasing doses of carboplatin (50, 100, 150, 200, 250mg/kg). \*1/3 deaths observed at day 42 following carboplatin treatment at a concentration of 100mg/kg (33% mortality). 100% mortality was observed at carboplatin concentrations of 150, 200 and 250mg/kg. (B) three cycles of combine treatment with carboplatin (3 x 80mg/kg) with AsiDNA (12 x 15mg) or olaparib (15 x 200mg/kg)

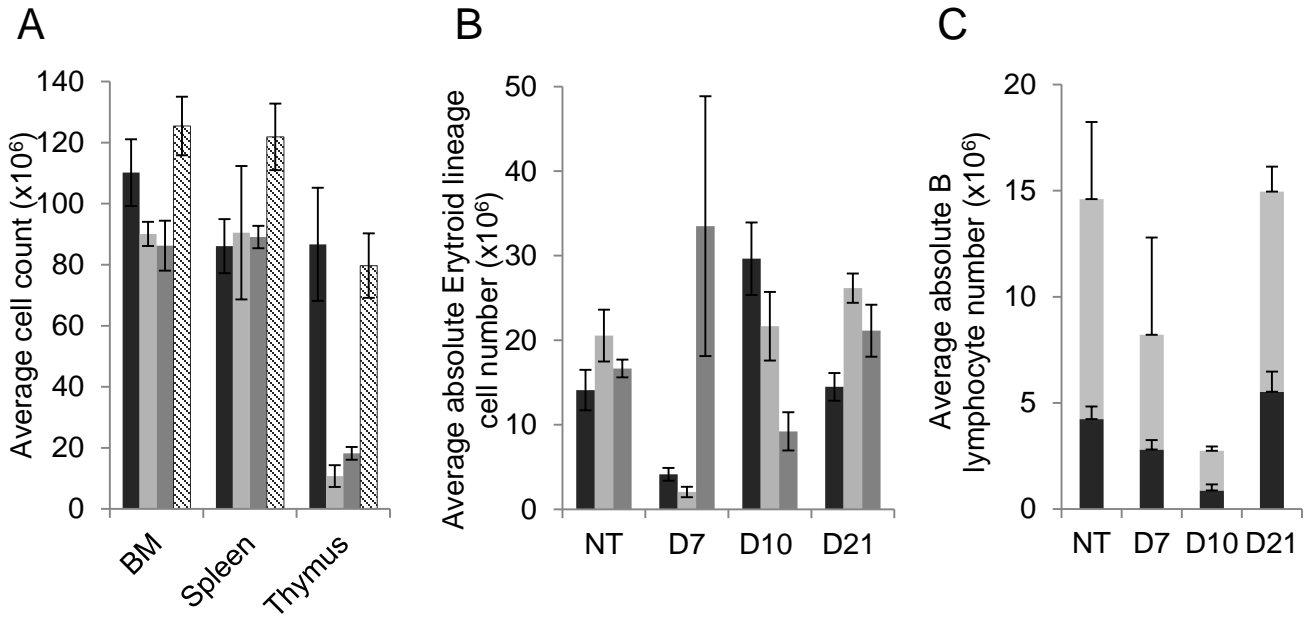

**Supplementary Figure S3: Effect of a single administration of carboplatin (80mg/kg).** (A) Average total cell counts of bone marrow (BM), spleens and thymus at 0 (black), 7 (light grey), 10 (grey) or 21 (dashed) days post treatment (B) Bone marrow average absolute cell number of the erythroid lineage at 0, 7, 10 or 21 days post treatment : Basophilic erythroblasts (black), Polychromatic erythroblasts (light grey) and Orthochromatic erythroblasts (mid grey) (C) Bone marrow average absolute cell number of Pre/Pro B lymphocytes (grey) and Mature B lymphocytes (black) at 0, 7, 10 or 21 days post treatment.

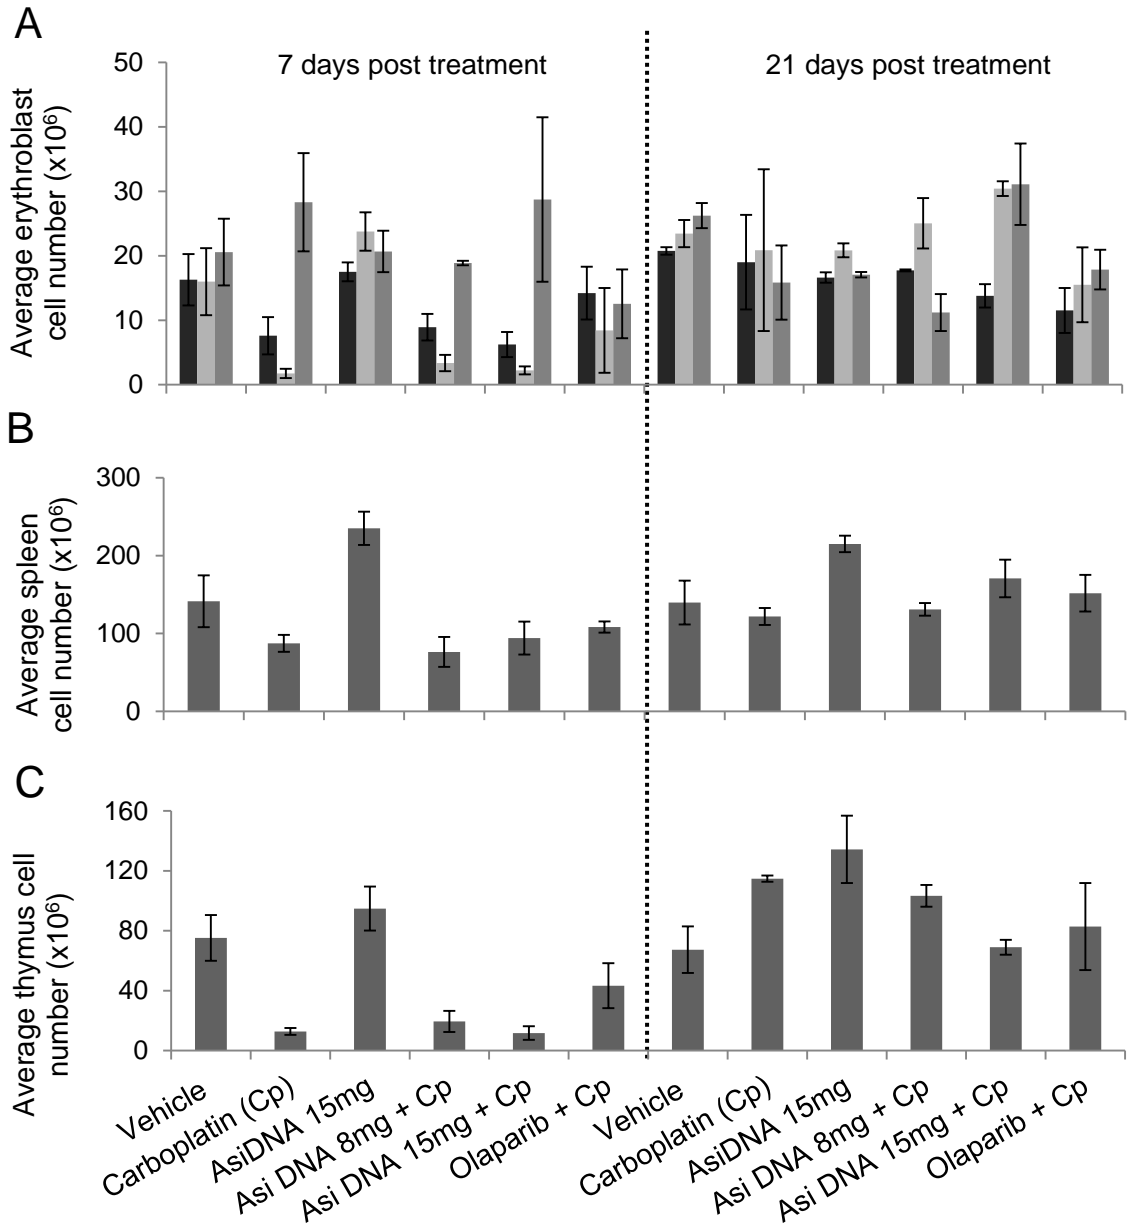

**Supplementary Figure S4: Effect of three cycles of different treatments.** Different combination of Carboplatin 80mg/kg, AsiDNA 8mg or 15mg and Olaparib 200mg/kg were used to treat mice. Average total cell number 7 and 21 days post treatment of (A) Bone marrow erythroid lineage : Basophilic erythroblasts (black), Polychromatic erythroblasts (light grey) and Orthochromatic erythroblasts (mid grey), (B) spleens and (C) thymus.

| <b>Antibody</b>                                                 | <b>Manufacturer/catalog<br/>ue No.</b> | <b>Cell type detected</b>                                                                            |
|-----------------------------------------------------------------|----------------------------------------|------------------------------------------------------------------------------------------------------|
| Rat Anti-mouse<br>CD45R/B220 Hu-PE-clone<br>RA3-6B2             | BD Biosciences<br>553089               | Entire B cell lineage (Pre-pro-B cell,<br>pro-B cell, pre-B cell, immature B cell,<br>mature B cell) |
| Rat anti-mouse CD90.2<br>(Thy1.2)-FITC-clone 53-2.1             | BD Biosciences<br>553004               | T lymphocytes (T cell precursors and<br>mature T cells)                                              |
| Rat anti-mouse TER-119-<br>PE/erythroid cells                   | BD Biosciences<br>553673               | Erythroid lineage (erythroid<br>precursors, reticulocytes and<br>erythrocytes)                       |
| Rat anti-mouse CD71-FITC                                        | BD Biosciences<br>553266               | Erythroid lineage (erythroid<br>progenitors and precursors)                                          |
| Rat anti-mouse Ly-6G and<br>Ly-6C (Gr-1) Ms-PE-clone<br>RB6-8C5 | BD Biosciences<br>553128               | Granulocytes                                                                                         |
| Rat anti-mouse CD11b<br>(Mac-1)-FITC-clone M1/70                | BD Biosciences<br>557396               | Macrocytes, megakaryocytes,<br>monocytes, activated lymphocytes                                      |
| PE Rat IgG2b -clone A95                                         | BD Biosciences<br>553989               | Isotype control                                                                                      |
| FITC IgG2a                                                      | BD Biosciences<br>553456               | Isotype control                                                                                      |

**Table S1: Antibodies used for flow cytometry.**

| Treatment              | Relative risk<br>(p value)   | Mice<br>(number) |
|------------------------|------------------------------|------------------|
| Vehicle                |                              | 6                |
| Carboplatin            | 0.37 (4.3 10 <sup>-2</sup> ) | 7                |
| AsiDNA                 | 0.25 (4.5 10 <sup>-3</sup> ) | 7                |
| Carboplatin + AsiDNA   | 0.14 ( 3 10 <sup>-4</sup> )  | 8                |
| Vehicle                |                              | 6                |
| Carboplatin            | 0.36 (5 10 <sup>-2</sup> )   | 6                |
| Olaparib               | 0.40 (5.2 10 <sup>-2</sup> ) | 9                |
| Carboplatin + Olaparib | 0.20 (3 10 <sup>-4</sup> )   | 10               |

**Table S2. Efficacy of combination treatments**
